# Supplementary material for: Hand Colonization with Gram-Negative Organisms of Healthcare Workers Accessing the Cardiac Intensive Care Unit: A Cross-Sectional Study at the Uganda Heart Institute
Source: Crit Care Res Pract. 2019 Oct 9;2019:6081954. doi: 10.1155/2019/6081954 (PMC6811803; doi:10.1155/2019/6081954)
Supplement: Supplementary Materials — The study describes colonization of healthcare workers' hands with GNOs and the antimicrobial resistance patterns of the identified isolates. We analyzed data collected during surveillance for MDR GNO conducted at the Uganda Heart Institute (UHI). The surveillance was triggered by the emergency of MDR GNO in the cardiac intensive care unit (ICU). Therefore, we focused on healthcare workers who access the cardiac ICU. The prevalence of hand colonization with MDR GNO was high among healthcare workers of all categories who access the cardiac ICU. MDR and carbapenem resistance were common. Acinetobacter, Pseudomonas, and Citrobacter spp were the most prevalent. Resistance to cefepime and ciprofloxacin was low. We emphasize implementation of strict hospital-wide infection prevention and control (IPC) guidelines, hand hygiene inclusive as an immediate and efficient solution as recommended by the WHO. [file 6081954.f1.xlsx]

## Sheet: Sheet1
				TOTAL NUMBER OF CULTURE DONE ON 56 HEALTHCARE WORKERS
STAFF CATEDORY/SOURCE OF SAMPLE	RESULTS/ISOLATE	ESBL	AMP	AMC	PRL	TPZ	CXM	CRO	CTX	CAZ	ATM	FEP	MEM	SXT	CIP	CN	C	TE	Carbapenemase
NON CLINICIAN	No growth
NON CLINICIAN	No growth
NON CLINICIAN	No growth
NON CLINICIAN	No growth
NON CLINICIAN	No growth
NON CLINICIAN	No growth
NON CLINICIAN	No growth
NON CLINICIAN	No growth
NON CLINICIAN	No growth
NON CLINICIAN	Acinetobacter sp	ESBL	X	X	I	S	X	X	X	S	x	S	R	S	S	S	X	R	positive
NON CLINICIAN	Acinetobacter sp		x	x	R	S	x	X	X	S	x	I	S	S	S	S	X	S
NON CLINICIAN	Acinetobacter sp		X	X	R	S	X	X	X	I	x	S	S	S	S	S	X	R
NON CLINICIAN	Acinetobacter sp		X	X	I	S	X	X	X	I	x	S	S	R	S	S	X	S
NON CLINICIAN	Acinetobacter sp		X	X	R	S	X	X	X	I	x	S	S	I	S	S	X	I
NON CLINICIAN	Bacillus sp
NON CLINICIAN	Enterobacter sp	ESBL	R	R	X	S	R	R	X	R	x	X	S	S	S	R	R	X
NON CLINICIAN	Citrobacter sp		R	R	X	S	R	R	X	R	x	X	S	S	S	R	R	X
NON CLINICIAN	Citrobacter sp		R	S	X	S	R	S	X	I	x	S	S	S	S	S	S	X
CSICU CLINICIAN	No growth
CSICU CLINICIAN	No growth
CSICU CLINICIAN	No growth
CSICU CLINICIAN	No growth
CSICU CLINICIAN	No growth
CSICU CLINICIAN	No growth
CSICU CLINICIAN	No growth
CSICU CLINICIAN	No growth
CSICU CLINICIAN	No growth
CSICU CLINICIAN	No growth
CSICU CLINICIAN	No growth
CSICU CLINICIAN	No growth
CSICU CLINICIAN	No growth
CSICU CLINICIAN	No growth
CSICU CLINICIAN	No growth
CSICU CLINICIAN	Acinetobacter sp		X	X	R	R	X	X	X	R	x	R	R	S	R	R	X	S	positive
CSICU CLINICIAN	Acinetobacter sp		x	x	I	S	X	X	X	I	x	S	R	I	S	S	X	S	positive
CSICU CLINICIAN	Acinetobacter sp		X	X	I	S	X	X	X	I	x	S	R	I	S	S	X	S	positive
CSICU CLINICIAN	Bacillus sp
CSICU CLINICIAN	Bacillus sp
CSICU CLINICIAN	Serratia spp		R	R	X	S	R	I	R	S	X	X	S	R	S	S	R	X
CSICU CLINICIAN	Citrobacter sp		S	S	X	S	S	S	S	S	x	S	S	S	S	S	S	X
CSICU CLINICIAN	Klebsiella pneumoniae	ESBL	R	R	X	S	S	R	R	R	x	X	R	R	I	R	S	X	positive
NON CSICU CLINICIAN	No growth
NON CSICU CLINICIAN	No growth
NON CSICU CLINICIAN	No growth
NON CSICU CLINICIAN	No growth
NON CSICU CLINICIAN	No growth
NON CSICU CLINICIAN	No growth
NON CSICU CLINICIAN	No growth
NON CSICU CLINICIAN	No growth
NON CSICU CLINICIAN	No growth
NON CSICU CLINICIAN	No growth
NON CSICU CLINICIAN	No growth
NON CSICU CLINICIAN	No growth
NON CSICU CLINICIAN	No growth
NON CSICU CLINICIAN	Acinetobacter sp		X	X	S	S	X	X	X	S	x	S	S	S	S	S	X	S
NON CSICU CLINICIAN	Acinetobacter sp		X	X	R	S	X	X	X	S	x	S	S	S	S	S	X	S
NON CSICU CLINICIAN	Acinetobacter sp		X	X	R	S	X	X	X	R	x	S	S	S	S	S	X	S
NON CSICU CLINICIAN	Bacillus sp
NON CSICU CLINICIAN	Citrobacter sp		R	I	X	I	R	I	R	R	x	X	S	S	S	S	S	X
NON CSICU CLINICIAN	Citrobacter sp		R	S	X	R	S	S	R	I	x	S	R	I	S	S	S	X	positive
NON CSICU CLINICIAN	Citrobacter sp		R	S	X	R	S	S	R	I	x	S	R	S	S	S	S	X	positive
NON CSICU CLINICIAN	Citrobacter sp		R	S	X	S	S	S	I	S	x	S	S	S	S	S	S	X
NON CSICU CLINICIAN	Pseudomonas sp		X	X	I	I	X	X	X	I	x	S	R	X	S	S	X	X	positive
NON CSICU CLINICIAN	Pseudomonas sp		X	X	X	S	X	X	X	S	x	S	S	X	S	S	X	X
NON CSICU CLINICIAN	Pseudomonas sp		X	X	I	S	X	X	X	S	x	S	S	X	S	S	X	X
NON CSICU CLINICIAN	Pseudomonas sp		X	X	I	I	X	X	X	S	x	S	S	X	S	S	X	X
NON CSICU CLINICIAN	Pseudomonas sp		X	X	I	S	X	X	X	S	x	S	R	X	S	S	X	X	positive
NON CSICU CLINICIAN	Pseudomonas sp		X	X	S	S	X	X	X	S	x	S	?	X	S	S	X	X
NON CSICU CLINICIAN	Pseudomonas sp		X	X	S	S	X	X	X	I	x	S	S	X	S	S	X	X
Key to abbreviations
Amp : Ampicillin					S: sensitive
PRL : Piperacillin					R: Resistant
AMC: Amoxycillin-Clavuanic acid					I : Intermediate Resistance
TPZ- Tarzobactam					X: not tested
CXM: Cefuroxime					ESBL : Extended beta lactamase producer
CRO; Ceftriaxone
CTX: Cefotaxime
CAZ: Ceftazidime
ATM: Aztreonam
FEP: Cefepime
MEM : Meropenem
SXT: Cotrimoxazole
CIP: Ciprofloxacin
CN: Gentamycin
C: Chloramphenicol
Te Tetracycline
		ISOLATES AND ANTIBIOTIC SENSITIVITY
SOURCE OF ISOLATE	ISOLATE	CTX	AMP	AMC	CXM	CRO	C	TE	PRL	SXT	FEP	TPZ	CAZ	MEM	CIP	CN	ESBL	Carbapenemase	No. of antibiotics with resistance
NON CLINICIAN	Acinetobacter sp	X	X	X	X	X	X	X	X	X	X	X	X	X	X	S			0
NON CLINICIAN	Citrobacter sp	S	S	S	S	S	S	X	X	S	S	S	S	S	S	S			0
NON CSICU CLINICIAN	Pseudomonas sp	X	X	X	X	X	X	X	X	X	S	S	S	S	S	S			0
NON CSICU CLINICIAN	Pseudomonas sp	X	X	X	X	X	X	X	S	X	S	S	I	S	S	S			0
NON CSICU CLINICIAN	Pseudomonas sp	X	X	X	X	X	X	X	I	X	S	S	S	S	S	S			0
NON CSICU CLINICIAN	Pseudomonas sp	X	X	X	X	X	X	X	I	X	S	I	S	S	S	S			0
NON CSICU CLINICIAN	Pseudomonas sp	X	X	X	X	X	X	X	S	X	S	S	S	S	S	S			0
NON CLINICIAN	Acinetobacter sp	X	x	x	x	X	X	S	R	S	I	S	S	S	S	S			1
NON CLINICIAN	Acinetobacter sp	X	X	X	X	X	X	I	R	I	S	S	I	S	S	S			1
NON CLINICIAN	Acinetobacter sp	X	X	X	X	X	X	S	R	S	S	S	S	S	S	S			1
NON CSICU CLINICIAN	Acinetobacter sp	X	X	X	X	X	X	S	I	R	S	S	I	S	S	S			1
NON CLINICIAN	Citrobacter sp	I	R	S	S	S	S	X	X	S	S	S	S	S	S	S			1
CSICU CLINICIAN	Acinetobacter sp	X	x	x	X	X	X	S	I	I	S	S	I	R	S	S		positive	1
NON CSICU CLINICIAN	Acinetobacter sp	X	X	X	X	X	X	S	I	I	S	S	I	R	S	S		positive	1
NON CSICU CLINICIAN	Pseudomonas sp	X	X	X	X	X	X	X	I	X	S	S	S	R	S	S		positive	1
NON CSICU CLINICIAN	Pseudomonas sp	X	X	X	X	X	X	X	I	X	S	I	I	R	S	S		positive	1
NON CLINICIAN	Acinetobacter sp	X	X	X	X	X	X	R	I	S	S	S	S	R	S	S	ESBL	positive	2
NON CSICU CLINICIAN	Acinetobacter sp	X	X	X	X	X	X	S	R	S	S	S	R	S	S	S			2
CSICU CLINICIAN	Acinetobacter sp	X	X	X	X	X	X	R	R	S	S	S	I	S	S	S			2
NON CSICU CLINICIAN	Citrobacter sp	X	R	S	R	S	S	X	X	S	S	S	I	S	S	S			2
CSICU CLINICIAN	Citrobacter sp	R	R	S	S	S	S	X	X	S	S	R	I	R	S	S		positive	3
NON CSICU CLINICIAN	Citrobacter sp	R	R	I	R	I	S	X	X	S	X	I	R	S	S	S			4
NON CSICU CLINICIAN	Citrobacter sp	R	R	S	S	S	S	X	X	I	S	R	I	R	S	S		positive	4
CSICU CLINICIAN	Serratia spp	R	R	R	R	I	R	X	X	R	X	S	S	S	S	S			6
CSICU CLINICIAN	Acinetobacter sp	X	X	X	X	X	X	S	R	S	R	R	R	R	R	R		positive	7
NON CSICU CLINICIAN	Citrobacter sp	X	R	R	R	R	R	X	X	S	X	S	R	S	S	R			7
NON CLINICIAN	Enterobacter sp	X	R	R	R	R	R	X	X	S	X	S	R	S	S	R	ESBL		7
CSICU CLINICIAN	Klebsiella pneumoniae	R	R	R	S	R	S	X	X	R	X	S	R	R	I	R	ESBL	positive	8
	ISOLATES EXPOSED	7	10	10	10	10	10	11	16	21	23	28	28	28	28	28	28	28
	TOTAL RESISTANCE	5	9	4	5	3	3	2	6	3	1	3	6	9	1	4	3	9
	PROPORTION
	PERCENTAGE
